# Supplementary material for: Uniform “water” content in quartz phenocrysts from silicic pyroclastic fallout deposits – implications on pre-eruptive conditions
Source: Copernicus journal article supplement (doi:10.5194/ejm-33-571-2021), 2021-09-24
Supplement: Supplementary file 1 [file Supplementary1.xlsx]

## Sheet: Evaluation
Bükk Foreland Volcanic Area, Hungary, Carpathian-Pannonian Region
				Without baseline correction																Concave rubberband baseline correction, 2 iterations
Sampling site	Code of the site	Code of the phenocrysts	Thickness (based on Biró et al., 2016)	Integrated absorbance									Structural OH concentration							Integrated absorbance									Structural OH- concetration
				3480	3430	3378	3430+3378	3315	3200	Total OH Region	Epoxy	SiO2 overtone (A-type int.)	3430 + 3378 + 3315 (more conservative)		(3430 + 3378) + 3315 Biró et al., 2017					3480 (Li)	3430	3378	3430+3378	3315	3200 (surface water)	Total Hydroxyl Region (3502-3153)	Epoxy	SiO (silica overtone) (A-type int.)	3430 + 3378 + 3315 (more conservative)		(3430 + 3378) + 3315 Biró et al., 2017
													ppm	H / 106 Si	ppm	H / 106 Si	absorp. coeff. L&R 1997 ppm												ppm	H / 106 Si	ppm	H / 106 Si
Eger, Tufakőbánya, layer B of Hencz et al., (2021) (pyroclastic fallout deposit)	E	1	176.679	0.005	0.048	0.343	0.684	0.116	0.034	1.962	0.905	568.987	6.19836	41.343	9.78045	65.2356	10.3238			0.005	0.047	0.342	0.668	0.113	0.029	1.521	0.85	579.843	6.13723	40.9353	9.54816	63.6862
		2	206.049	0.003	0.046	0.303	0.614	0.106	0.043	1.772	0.734	654.931	4.76975	31.8142	7.54773	50.3434	7.96705			0.003	0.045	0.302	0.598	0.104	0.038	1.331	0.715	676.231	4.72782	31.5345	7.35904	49.0848
		3	176.412	0.001	0.049	0.324	0.651	0.105	0.037	1.75	0.242	576.102	5.85265	39.0372	9.25649	61.7408	9.77074			0	0.047	0.323	0.635	0.102	0.032	1.31	0.31	578.968	5.77918	38.5472	9.02385	60.1891
		4	208.955	0.002	0.052	0.346	0.697	0.124	0.048	2.19	0.406	716.745	5.39598	35.9912	8.48678	56.6068	8.95827			0.001	0.05	0.345	0.68	0.121	0.042	1.73	0.467	685.771	5.33396	35.5775	8.28004	55.2279
		5	228.451	0.006	0.062	0.448	0.881	0.145	0.047	2.436	1.35	760.346	6.19301	41.3074	9.7008	64.7044	10.2397			0.006	0.06	0.447	0.864	0.142	0.041	1.966	1.305	749.754	6.13628	40.929	9.5117	63.4431
		6	222.063	0.006	0.06	0.401	0.8	0.132	0.045	2.213	0.574	731.716	5.76808	38.4731	9.06552	60.467	9.56916			0.005	0.058	0.4	0.783	0.13	0.039	1.75	0.623	728.79	5.71945	38.1487	8.88071	59.2343
		7	249.761	0.008	0.047	0.362	0.688	0.124	0.047	1.944	2.517	857.265	4.60953	30.7456	7.0224	46.8394	7.41253			0.008	0.046	0.361	0.671	0.122	0.041	1.469	2.42	819.69	4.57494	30.5148	6.85808	45.7434
		8	211.58	0.008	0.049	0.315	0.634	0.109	0.041	1.8	0.545	679.041	4.82882	32.2082	7.58523	50.5935	8.00663			0.008	0.047	0.314	0.617	0.106	0.035	1.342	0.577	694.383	4.76757	31.7997	7.38105	49.2316
		9	236.801	0.005	0.059	0.421	0.83	0.141	0.045	2.232	0.854	782.665	5.66451	37.7823	8.85707	59.0767	9.34913			0.005	0.057	0.419	0.812	0.138	0.04	1.76	0.852	777.156	5.60066	37.3564	8.66552	57.799
		10	212.763	0.009	0.062	0.459	0.895	0.153	0.044	2.768	1.871	755.164	6.84253	45.6397	10.6394	70.965	11.2305			0.009	0.06	0.458	0.879	0.151	0.038	2.31	1.746	698.268	6.79177	45.3011	10.4567	69.7461
		12	278.98	0.008	0.091	0.625	1.234	0.204	0.054	3.256	0.929	959.461	7.12308	47.5109	11.1337	74.2617	11.7522			0.008	0.089	0.624	1.217	0.201	0.049	2.783	0.909	915.586	7.07662	47.2011	10.9788	73.2288
		13	280.098	0.006	0.066	0.418	0.842	0.148	0.059	2.367	0.619	950.871	4.87372	32.5077	7.63447	50.9219	8.0586			0.005	0.064	0.417	0.825	0.145	0.053	1.902	0.706	919.254	4.82745	32.1991	7.48024	49.8932
		14	251.165	0.008	0.07	0.48	0.958	0.16	0.049	2.592	0.596	837.106	6.10595	40.7267	9.61472	64.1302	10.1489			0.007	0.068	0.479	0.941	0.158	0.044	2.12	0.683	824.298	6.06295	40.4399	9.45132	63.0403
		15	251.715	0.01	0.077	0.511	1.028	0.17	0.05	2.895	0.185	838.955	6.50451	43.3851	10.2802	68.569	10.8513			0.01	0.076	0.51	1.011	0.167	0.044	2.425	0.363	826.102	6.4616	43.0989	10.1086	67.4243
		17	157.09	0.004	0.029	0.211	0.419	0.077	0.034	1.271	0.854	510.506	4.35876	29.073	6.82002	45.4895	7.19891			0.004	0.028	0.21	0.403	0.075	0.029	0.834	0.804	515.555	4.30376	28.7061	6.57252	43.8387
		18	267.367	0.007	0.071	0.452	0.913	0.157	0.056	2.626	1.478	909.309	5.49357	36.6421	8.6443	57.6575	9.12453			0.007	0.069	0.451	0.896	0.154	0.05	2.164	1.401	877.472	5.4451	36.3188	8.48272	56.5797
		19	286.488	0.005	0.066	0.456	0.927	0.165	0.067	2.881	0.947	999.223	5.17969	34.5486	8.23322	54.9156	8.69063			0.004	0.064	0.455	0.909	0.162	0.061	2.411	0.944	940.225	5.13446	34.2468	8.07489	53.8595
		20	294.983	0.004	0.065	0.424	0.88	0.153	0.076	2.452	0.316	1006.98	4.70102	31.3558	7.5641	50.4526	7.98433			0.004	0.063	0.423	0.862	0.15	0.07	1.969	0.537	968.104	4.65709	31.0628	7.41033	49.4269
		21	298.617	0.008	0.083	0.561	1.132	0.191	0.062	3.062	0.712	1023.15	6.03984	40.2858	9.56972	63.83	10.1014			0.007	0.081	0.56	1.115	0.188	0.057	2.588	0.759	980.031	5.99644	39.9963	9.42505	62.8651
		22	303.808	0.004	0.095	0.659	1.317	0.217	0.064	3.509	0.641	1038.03	6.90357	46.0468	10.9064	72.7454	11.5123			0.004	0.093	0.658	1.3	0.214	0.058	3.041	0.738	997.068	6.86091	45.7623	10.7642	71.797
		23	291.009	0.007	0.084	0.589	1.173	0.194	0.064	3.283	0.59	1027.26	6.43526	42.9232	10.1465	67.6771	10.7102			0.006	0.083	0.588	1.156	0.192	0.058	2.803	0.707	955.063	6.40557	42.7252	10.0055	66.7364
		24	291.488	0.006	0.085	0.579	1.163	0.194	0.063	3.185	0.276	1012.07	6.358	42.4079	10.0557	67.0716	10.6144			0.006	0.083	0.578	1.145	0.191	0.057	2.714	0.491	956.634	6.31354	42.1113	9.9001	66.0337
		25	309.213	0.007	0.083	0.56	1.125	0.193	0.067	3.206	1.734	1065.84	5.83986	38.9519	9.20687	61.4098	9.71836			0.007	0.081	0.559	1.107	0.19	0.062	2.726	1.674	1014.8	5.79795	38.6723	9.06017	60.4314
		26	301.747	0.009	0.106	0.705	1.41	0.226	0.059	3.718	0.003	1056.99	7.42318	49.5126	11.711	78.1124	12.3616			0.009	0.104	0.703	1.392	0.223	0.054	3.226	0.287	990.303	7.37307	49.1784	11.5607	77.1098
		27	268.899	0.003	0.065	0.411	0.841	0.144	0.062	2.389	0.369	946.057	4.98032	33.2187	7.91228	52.7749	8.35185			0.003	0.063	0.41	0.823	0.141	0.056	1.915	0.456	882.498	4.93212	32.8972	7.74359	51.6498
		28	277.526	0.004	0.073	0.482	0.974	0.166	0.059	2.692	0.861	968.074	5.61159	37.4293	8.8727	59.1809	9.36563			0.003	0.071	0.481	0.956	0.163	0.053	2.211	0.851	910.811	5.56489	37.1178	8.70925	58.0907
		43	317.341	0.008	0.142	0.965	1.923	0.296	0.057	4.933	0.537	1100.08	9.5496	63.6958	15.1037	100.742	15.9428			0.008	0.14	0.963	1.905	0.293	0.051	4.454	0.629	1041.48	9.50195	63.378	14.9608	99.7886
		46	309.722	0.009	0.092	0.627	1.269	0.21	0.061	3.36	0.686	1181.69	6.47885	43.2139	10.3145	68.798	10.8876			0.009	0.09	0.626	1.251	0.207	0.055	2.847	0.723	1016.48	6.437	42.9348	10.1681	67.8212
		48	253.344	0	0.056	0.414	0.826	0.149	0.055	2.342	1.705	985.984	5.27756	35.2013	8.31279	55.4463	8.77462			-0.001	0.054	0.413	0.808	0.146	0.049	1.839	1.6	831.451	5.2264	34.8601	8.13375	54.2521
		50	272.72	0.003	0.06	0.385	0.795	0.14	0.064	2.257	-0.077	1026.36	4.63332	30.9042	7.40539	49.3939	7.8168			0.003	0.058	0.384	0.777	0.137	0.058	1.776	0.17	895.041	4.5858	30.5873	7.23906	48.2846
		Average spectrum	256.428	0.006	0.07	0.475	0.951	0.16	0.054	2.645	0.799	884.232	5.93852	39.6099	9.35843	62.4207	9.87834			0.005	0.068	0.473	0.934	0.158	0.048	2.175	0.843	841.57	5.88798	39.2728	9.19838	61.3532
												min	4.35876	29.073	6.82002	45.4895	7.19891											min	4.30376	28.7061	6.57252	43.8387
												max	9.5496	63.6958	15.1037	100.742	15.9428											max	9.50195	63.378	14.9608	99.7886
												average	5.86648	39.1294	9.24614	61.6718	9.75982											average	5.81778	38.8046	9.07315	60.5179
												std. deviation	1.05396	7.02992	1.6662	11.1136	1.75877											std. deviation	1.05465	7.03451	1.67687	11.1847
												relative std. dev.	17.9658	17.9658	18.0205	18.0205	18.0205											relative std. dev.	18.128	18.128	18.4816	18.4816
Ostoros, Arany János street, layer B of Hencz et al., (2021) (pyroclastic fallout deposit)	O	2	250.747	0.008	0.058	0.359	0.739	0.139	0.057	2.239	0.981	878.926	4.78953	31.9462	7.56333	50.4474	7.98351			0.009	0.053	0.356	0.699	0.132	0.057	1.28	0.783	822.926	4.66032	31.0843	7.15846	47.7469
		3	257.257	0.012	0.092	0.589	1.19	0.2	0.055	3.243	0.33	906.201	7.39712	49.3388	11.6708	77.8444	12.3192			0.012	0.087	0.586	1.148	0.193	0.049	2.159	0.354	844.291	7.27118	48.4988	11.2594	75.1003
		4	270.263	0.018	0.069	0.453	0.896	0.173	0.065	2.967	0.171	957.046	5.55458	37.0491	8.54367	56.9863	9.01832			0.018	0.064	0.45	0.854	0.165	0.056	1.865	0.248	886.977	5.42671	36.1961	8.14406	54.3209
		6	255.279	0.017	0.073	0.503	0.973	0.176	0.059	2.989	0.444	920.164	6.36293	42.4407	9.72208	64.8463	10.2622			0.017	0.068	0.5	0.931	0.168	0.048	1.881	0.425	837.799	6.22755	41.5377	9.29902	62.0244
		7	226.19	0.006	0.063	0.428	0.845	0.148	0.05	2.502	0.596	840.856	6.10212	40.7011	9.48263	63.2492	10.0094			0.007	0.059	0.425	0.803	0.141	0.048	1.463	0.508	742.334	5.96843	39.8094	9.01471	60.1281
		8	216.617	0.009	0.089	0.628	1.222	0.194	0.045	3.29	0.634	816.377	9.08406	60.5907	14.1197	94.1782	14.9041			0.009	0.085	0.626	1.182	0.188	0.041	2.261	0.542	710.915	8.9644	59.7925	13.661	91.1188
		9	239.796	0.008	0.053	0.347	0.709	0.129	0.063	2.283	0.603	884.854	4.76505	31.7829	7.54841	50.3479	7.96777			0.01	0.049	0.344	0.668	0.122	0.057	1.223	0.56	786.987	4.63894	30.9417	7.11604	47.464
		10	238.818	0.01	0.058	0.398	0.788	0.143	0.058	2.391	0.446	875.517	5.41768	36.1359	8.42047	56.1645	8.88827			0.011	0.053	0.395	0.745	0.136	0.055	1.349	0.43	783.777	5.28201	35.231	7.96824	53.1482
		11	225.181	0.008	0.052	0.345	0.681	0.129	0.055	2.133	0.363	835.611	5.04554	33.6537	7.76974	51.8242	8.2014			0.01	0.047	0.342	0.64	0.121	0.053	1.136	0.347	739.022	4.89206	32.63	7.29972	48.6892
		12	249.966	0.011	0.07	0.488	0.965	0.167	0.06	2.791	0.337	924.935	6.26485	41.7865	9.7818	65.2446	10.3252			0.013	0.065	0.485	0.924	0.16	0.056	1.732	0.372	820.364	6.13523	40.922	9.36703	62.4781
		13	257.792	0.007	0.058	0.392	0.787	0.143	0.067	2.418	0.27	961.529	4.96867	33.141	7.79234	51.9749	8.22525			0.009	0.053	0.389	0.745	0.136	0.063	1.353	0.337	846.046	4.84298	32.3027	7.38178	49.2365
		15	277.137	0.009	0.08	0.576	1.132	0.196	0.067	3.408	1.122	1019.84	6.64048	44.292	10.3504	69.0373	10.9254			0.009	0.076	0.573	1.09	0.189	0.059	2.301	0.924	909.535	6.53136	43.5642	9.96851	66.49
		16	234.851	0.013	0.072	0.505	0.99	0.168	0.053	2.843	0.454	863.79	6.85201	45.7029	10.6505	71.0389	11.2422			0.015	0.067	0.502	0.949	0.161	0.048	1.783	0.427	770.757	6.71405	44.7827	10.209	68.0942
		17	262.884	0.007	0.077	0.501	1.039	0.177	0.062	2.935	1.122	945.37	6.20349	41.3773	9.99132	66.6421	10.5464			0.008	0.073	0.498	0.996	0.17	0.059	1.854	0.903	862.76	6.08846	40.61	9.58049	63.9019
		18	255.4	0.011	0.06	0.385	0.841	0.136	0.064	2.945	0.426	936.052	4.91371	32.7744	8.26281	55.1129	8.72185			0.01	0.056	0.382	0.799	0.129	0.057	1.828	0.455	838.197	4.7953	31.9847	7.8484	52.3488
		19	271.705	0.005	0.054	0.386	0.815	0.142	0.07	2.538	0.299	984.037	4.62679	30.8607	7.60797	50.7452	8.03064			0.005	0.05	0.383	0.774	0.135	0.068	1.472	0.378	891.707	4.51549	30.1183	7.22638	48.2
		20	244.378	0.012	0.076	0.487	0.956	0.172	0.054	2.75	-0.064	896.611	6.49649	43.3316	9.97012	66.5007	10.524			0.013	0.071	0.484	0.914	0.165	0.052	1.767	0.075	802.025	6.3639	42.4472	9.53702	63.6119
		21	261.742	0.018	0.095	0.641	1.234	0.214	0.051	3.456	0.334	941.662	7.83979	52.2914	11.9495	79.7031	12.6134			0.017	0.09	0.638	1.192	0.207	0.045	2.395	0.379	859.01	7.716	51.4658	11.5451	77.006
		22	243.479	0.017	0.079	0.526	1.006	0.183	0.051	2.907	0.085	880.521	6.99067	46.6278	10.5481	70.3559	11.1341			0.017	0.075	0.524	0.965	0.176	0.046	1.922	0.17	799.073	6.87534	45.8585	10.1223	67.5156
		24	261.673	0.019	0.073	0.484	0.923	0.177	0.057	2.865	0.822	943.817	6.05885	40.4125	9.08002	60.5637	9.58447			0.018	0.069	0.481	0.881	0.17	0.05	1.811	0.788	858.786	5.94329	39.6417	8.67555	57.8659
		25	240.163	0.014	0.05	0.336	0.65	0.132	0.058	2.076	0.383	872.015	4.65883	31.0744	7.03321	46.9115	7.42395			0.014	0.046	0.333	0.609	0.125	0.057	1.214	0.371	788.192	4.53292	30.2345	6.60151	44.0321
		26	237.301	0.015	0.059	0.366	0.729	0.134	0.055	2.314	0.274	867.418	5.08822	33.9384	7.85534	52.3951	8.29175			0.016	0.055	0.363	0.687	0.127	0.053	1.331	0.296	778.798	4.96079	33.0885	7.40933	49.4202
		27	260.903	0.012	0.054	0.357	0.706	0.136	0.065	2.248	0.663	956.417	4.52858	30.2056	6.97087	46.4957	7.35814			0.014	0.049	0.354	0.664	0.129	0.063	1.255	0.603	856.257	4.4044	29.3773	6.5652	43.7899
		29	257.503	0.009	0.065	0.426	0.853	0.153	0.062	2.572	0.316	951.628	5.40203	36.0315	8.43857	56.2853	8.90738			0.011	0.061	0.423	0.811	0.145	0.057	1.511	0.371	845.1	5.2762	35.1923	8.01916	53.4878
		30	246.679	0.01	0.08	0.527	1.034	0.177	0.054	2.879	0.506	878.165	6.86496	45.7893	10.6039	70.7281	11.193			0.011	0.075	0.524	0.993	0.17	0.052	1.853	0.455	809.575	6.73362	44.9132	10.1836	67.9247
		34	266.091	0.021	0.09	0.555	1.172	0.18	0.055	3.81	0.325	895.632	6.69697	44.6688	10.9749	73.2026	11.5846			0.02	0.086	0.552	1.132	0.173	0.047	2.726	0.383	873.283	6.58332	43.9107	10.5934	70.6579
		36	268.505	0.008	0.077	0.504	1.014	0.172	0.061	2.764	0.045	923.042	6.05753	40.4037	9.54081	63.6372	10.0709			0.009	0.073	0.501	0.972	0.165	0.059	1.717	0.169	881.208	5.94491	39.6525	9.14663	61.008
		38	277.7	0.006	0.08	0.532	1.052	0.182	0.062	2.952	0.498	966.874	6.17588	41.1931	9.59828	64.0205	10.1315			0.006	0.075	0.529	1.01	0.175	0.058	1.889	0.508	911.383	6.0592	40.4149	9.21715	61.4784
		51	267.246	0.006	0.074	0.465	0.945	0.161	0.062	2.774	0.005	913.564	5.6577	37.7369	8.93917	59.6242	9.43579			0.006	0.069	0.462	0.904	0.154	0.059	1.718	0.135	877.076	5.53646	36.9282	8.55121	57.0366
		53	243.752	0.013	0.079	0.523	1.031	0.177	0.056	3.122	0.632	839.974	6.90309	46.0436	10.7047	71.4001	11.2994			0.013	0.075	0.52	0.991	0.17	0.049	2.07	0.522	799.969	6.77903	45.2161	10.2882	68.6221
		Average spectrum	252.233	0.011	0.07	0.467	0.931	0.164	0.058	2.78	0.447	909.282	6.00302	40.0401	9.37704	62.5448	9.89798			0.012	0.066	0.464	0.889	0.157	0.054	1.737	0.441	827.804	5.88313	39.2405	8.95743	59.746
												min	4.52858	30.2056	6.97087	46.4957	7.35814											min	4.4044	29.3773	6.5652	43.7899
												max	9.08406	60.5907	14.1197	94.1782	14.9041											max	8.9644	59.7925	13.661	91.1188
												average	6.01361	40.1108	9.38285	62.5836	9.90412											average	5.8888	39.2783	8.96525	59.7982
												std. deviation	1.05492	7.03632	1.60934	10.7343	1.69875											std. deviation	1.05628	7.04538	1.6088	10.7307
												relative std. dev.	17.5422	17.5422	17.1519	17.1519	17.1519											relative std. dev.	17.9371	17.9371	17.9448	17.9448
Sály, Latorvár, layer B of Hencz et al., (2021) (pyroclastic fallout deposit)	S	1	246.767	0.006	0.069	0.472	0.94	0.154	0.045	2.459	0.213	728.37	6.08346	40.5767	9.57598	63.8718	10.108			0.005	0.067	0.471	0.923	0.151	0.04	1.992	0.387	809.866	6.03094	40.2264	9.40092	62.7041
		2	246.977	0.007	0.072	0.478	0.956	0.156	0.043	2.487	0.112	729.579	6.1745	41.1839	9.72528	64.8676	10.2656			0.006	0.07	0.477	0.938	0.153	0.037	2.018	0.307	810.554	6.12203	40.8339	9.54162	63.6426
		3	233.925	0.008	0.046	0.291	0.587	0.106	0.049	1.865	0.502	716.19	4.09054	27.2839	6.39898	42.6812	6.75448			0.007	0.044	0.289	0.57	0.103	0.044	1.404	0.6	767.718	4.02591	26.8528	6.2143	41.4494
		4	263.35	0.008	0.095	0.647	1.282	0.208	0.069	3.329	0.573	773.453	7.79191	51.972	12.221	81.514	12.8999			0.007	0.093	0.646	1.265	0.205	0.064	2.853	0.611	864.289	7.74269	51.6438	12.0569	80.4199
		5	254.89	0.006	0.062	0.414	0.825	0.141	0.053	2.244	0.575	784.066	5.2286	34.8748	8.1861	54.6013	8.64089			0.006	0.06	0.413	0.808	0.138	0.047	1.77	0.652	836.525	5.17775	34.5356	8.01662	53.4709
		6	238.527	0.006	0.062	0.403	0.811	0.135	0.047	2.225	0.395	751.193	5.43334	36.2404	8.56656	57.139	9.04248			0.005	0.06	0.402	0.794	0.132	0.041	1.758	0.527	782.823	5.37901	35.878	8.38545	55.931
		7	215.429	0.007	0.048	0.297	0.592	0.104	0.048	1.693	0.635	662.609	4.5019	30.0277	6.97845	46.5463	7.36614			0.006	0.046	0.296	0.576	0.102	0.043	1.24	0.625	707.016	4.45177	29.6933	6.79797	45.3425
		8	220.467	0.011	0.065	0.44	0.88	0.141	0.039	2.544	0.86	643.157	6.32912	42.2152	10.0031	66.7209	10.5589			0.011	0.063	0.438	0.864	0.139	0.034	2.104	0.823	723.55	6.27033	41.8231	9.82679	65.5447
		9	234.403	0.009	0.077	0.513	1.023	0.164	0.04	2.747	0.622	701.344	6.94804	46.3434	10.9381	72.957	11.5458			0.008	0.075	0.512	1.006	0.161	0.035	2.284	0.646	769.287	6.89275	45.9746	10.7538	71.7278
		10	259.991	0.007	0.078	0.517	1.027	0.168	0.042	2.811	0.871	764.888	6.33899	42.2811	9.92804	66.22	10.4796			0.006	0.076	0.515	1.01	0.165	0.036	2.34	0.842	853.264	6.28084	41.8932	9.76188	65.1118
		11	261.477	0.01	0.079	0.514	1.026	0.169	0.052	2.76	0.493	820.993	6.29469	41.9856	9.8716	65.8435	10.42			0.009	0.077	0.513	1.009	0.166	0.046	2.288	0.568	858.143	6.24513	41.655	9.70638	64.7416
		12	266.432	0.007	0.065	0.413	0.836	0.147	0.051	2.332	0.56	807.947	5.06697	33.7967	7.96932	53.1554	8.41206			0.007	0.063	0.412	0.819	0.145	0.045	1.856	0.637	874.402	5.02643	33.5263	7.81529	52.128
		14	279.001	0.011	0.096	0.62	1.241	0.201	0.048	3.216	0.081	825.025	7.09932	47.3525	11.1638	74.4627	11.784			0.011	0.094	0.618	1.223	0.198	0.042	2.742	0.352	915.654	7.04513	46.991	11.0012	73.3783
		16	270.762	0.005	0.075	0.49	0.982	0.164	0.055	2.605	0.123	844.891	5.81559	38.79	9.1422	60.9785	9.6501			0.005	0.073	0.488	0.965	0.161	0.05	2.131	0.388	888.614	5.75974	38.4175	8.98265	59.9143
		17	282.033	0.004	0.057	0.394	0.798	0.148	0.063	2.298	0.973	878.021	4.58754	30.5989	7.2451	48.3248	7.64761			0.003	0.055	0.393	0.781	0.145	0.057	1.82	0.935	925.605	4.54159	30.2924	7.09193	47.3032
		18	265.243	0.011	0.065	0.446	0.909	0.148	0.052	2.656	0.981	861.061	5.36655	35.7949	8.60765	57.4131	9.08586			0.011	0.063	0.445	0.892	0.145	0.046	2.187	1.001	870.501	5.31769	35.469	8.44478	56.3267
		19	283.28	0.013	0.102	0.729	1.453	0.23	0.052	3.753	0.057	915.839	8.09008	53.9608	12.8328	85.5948	13.5457			0.013	0.101	0.728	1.436	0.227	0.046	3.282	0.351	929.698	8.05195	53.7065	12.6803	84.5776
		20	276.195	0.011	0.066	0.437	0.875	0.15	0.056	2.427	0.59	882.405	5.10682	34.0625	8.01607	53.4672	8.46141			0.01	0.064	0.435	0.858	0.147	0.05	1.941	0.727	906.445	5.05208	33.6974	7.85966	52.4239
		21	279.289	0.006	0.066	0.422	0.85	0.149	0.057	2.322	0.442	880.421	4.9265	32.8598	7.72618	51.5336	8.15541			0.006	0.064	0.42	0.833	0.146	0.052	1.856	0.603	916.6	4.87236	32.4987	7.5715	50.5019
		23	246.232	0.01	0.067	0.452	0.91	0.154	0.046	2.465	0.308	755.604	5.90371	39.3777	9.33365	62.2554	9.85218			0.01	0.065	0.45	0.893	0.151	0.04	2.006	0.449	808.108	5.8423	38.9681	9.1582	61.0852
		33	298.132	0.011	0.09	0.654	1.294	0.213	0.061	3.477	2.448	1024.61	6.93357	46.2469	10.9184	72.8256	11.525			0.01	0.088	0.652	1.276	0.21	0.055	3.005	2.357	978.44	6.88285	45.9086	10.7662	71.8108
		41	273.934	0.006	0.064	0.436	0.875	0.151	0.06	2.407	0.467	911.377	5.13321	34.2385	8.09012	53.9611	8.53958			0.006	0.062	0.434	0.857	0.148	0.055	1.924	0.575	899.024	5.07801	33.8703	7.92454	52.8567
		42	265.922	0.011	0.067	0.472	0.973	0.163	0.064	3.029	1.918	1064.9	5.70213	38.0332	9.22738	61.5466	9.74001			0.011	0.066	0.471	0.957	0.161	0.059	2.564	1.814	872.728	5.66964	37.8165	9.08117	60.5714
		Average spectrum	259.246	0.008	0.071	0.476	0.954	0.159	0.052	2.615	0.644	814.259	5.88229	39.2348	9.27335	61.8532	9.78853			0.008	0.069	0.475	0.937	0.156	0.046	2.146	0.729	850.82	5.83229	38.9014	9.10671	60.7418
												min	4.09054	27.2839	6.39898	42.6812	6.75448											min	4.02591	26.8528	6.2143	41.4494
												max	8.09008	53.9608	12.8328	85.5948	13.5457											max	8.05195	53.7065	12.6803	84.5776
												average	5.86726	39.1347	9.24634	61.6731	9.76003											average	5.81561	38.7901	9.08001	60.5636
												std. deviation	1.00881	6.72879	1.5999	10.6714	1.68879											std. deviation	1.01017	6.73782	1.60157	10.6825
												relative std. dev.	17.194	17.194	17.3031	17.3031	17.3031											relative std. dev.	17.3699	17.3699	17.6384	17.6384
Tibolddaróc, wine cellars, Unit III/A/2 of Biró et al., (2020)	TD	0	189.27	0.001	0.041	0.241	0.532	0.087	0.04	1.829	1.042	690.05	4.21112	28.0882	7.06419	47.1181	7.45664			0.003	0.036	0.238	0.492	0.081	0.037	0.807	0.819	621.166	4.05135	27.0225	6.53922	43.6166
		1	227.84	-0.006	0.042	0.315	0.651	0.113	0.049	2.428	1.516	747.748	4.45576	29.7199	7.24298	48.3107	7.64537			-0.006	0.042	0.315	0.651	0.113	0.049	2.428	1.516	747.748	4.45576	29.7199	7.24298	48.3107
		2	207.38	0	0.043	0.301	0.61	0.101	0.05	2.366	1.664	741.598	4.63497	30.9152	7.40553	49.3949	7.81695			0.002	0.039	0.298	0.569	0.094	0.04	1.302	1.438	680.601	4.48915	29.9426	6.90558	46.0602
		3	227.063	-0.003	0.055	0.361	0.726	0.119	0.055	2.729	2.239	818.532	5.08933	33.9458	8.03829	53.6154	8.48486			-0.001	0.05	0.358	0.684	0.112	0.042	1.629	1.979	745.199	4.94664	32.9941	7.57216	50.5063
		5	217.806	0.001	0.057	0.384	0.783	0.12	0.055	2.972	2.169	815.082	5.56349	37.1085	8.95513	59.7307	9.45264			0.002	0.053	0.381	0.742	0.114	0.041	1.847	1.919	714.817	5.43456	36.2485	8.48903	56.6218
		5 (again)	222.896	0.005	0.086	0.567	1.11	0.169	0.039	3.231	2.627	848.657	7.96568	53.1311	12.3943	82.6699	13.0829			0.004	0.082	0.564	1.068	0.162	0.036	2.134	2.313	731.523	7.83001	52.2262	11.9195	79.5027
		6	296.103	0.006	0.077	0.516	1.026	0.174	0.065	3.356	2.343	1105.59	5.59508	37.3192	8.75371	58.3872	9.24002			0.005	0.072	0.513	0.982	0.167	0.057	2.178	2.096	971.781	5.48566	36.5893	8.38167	55.9058
		7	260.632	0.01	0.075	0.509	1.004	0.171	0.051	3.284	2.714	963.408	6.25709	41.7348	9.73786	64.9515	10.2789			0.009	0.071	0.506	0.962	0.164	0.046	2.166	2.434	855.369	6.14107	40.9609	9.33177	62.2429
		8	232.322	0.003	0.054	0.307	0.641	0.118	0.055	2.793	3.097	916.855	4.45348	29.7047	7.05677	47.0687	7.44881			0.002	0.049	0.304	0.599	0.111	0.045	1.644	2.779	762.456	4.31402	28.7745	6.6012	44.03
		10_av	254.628	0.0045	0.0545	0.364	0.744	0.1305	0.0555	2.7525	2.063	915.613	4.65714	31.0631	7.41834	49.4803	7.83047			0.0045	0.0505	0.361	0.702	0.124	0.0485	1.644	1.8505	835.665	4.54262	30.2993	7.00692	46.7361
		13_av	281.381	0.0054	0.0695	0.4642	0.9806	0.1728	0.0569	3.5408	2.9707	981.707	5.4234	36.1741	8.854	59.0562	9.34588			0.0046	0.065	0.4612	0.9384	0.1654	0.0458	2.4121	2.7225	923.463	5.30902	35.4112	8.47324	56.5165
		14	269.852	0.01	0.06	0.392	0.803	0.152	0.065	3.05	1.996	954.725	4.83466	32.2472	7.6442	50.9868	8.06888			0.009	0.055	0.389	0.76	0.144	0.059	1.933	1.776	885.626	4.70659	31.3929	7.23598	48.264
		15	294.257	0.008	0.075	0.538	1.076	0.194	0.064	3.704	2.374	1037.26	5.9238	39.5118	9.32246	62.1808	9.84038			0.007	0.071	0.535	1.034	0.187	0.054	2.574	2.151	965.722	5.82103	38.8263	8.96278	59.7817
		16	249.412	0.006	0.077	0.556	1.106	0.188	0.054	3.961	2.895	934.887	7.11016	47.4247	11.2065	74.7474	11.8291			0.005	0.072	0.553	1.063	0.181	0.042	2.808	2.613	818.546	6.98025	46.5583	10.7735	71.8592
		17	301.704	0.01	0.088	0.597	1.196	0.208	0.066	4.014	2.737	1095.83	6.39329	42.6433	10.0517	67.045	10.6101			0.009	0.084	0.594	1.153	0.201	0.056	2.85	2.474	990.161	6.29306	41.9747	9.69375	64.6573
		19	286.713	0.005	0.095	0.625	1.24	0.218	0.073	4.351	2.753	1129.82	7.06659	47.1342	10.9841	73.264	11.5943			0.004	0.09	0.622	1.195	0.211	0.058	3.111	2.409	940.962	6.95358	46.3804	10.5924	70.651
		20	342.53	0.006	0.088	0.515	1.078	0.212	0.088	3.592	2.145	1338.36	5.1394	34.2798	8.13476	54.2588	8.58669			0.007	0.083	0.511	1.032	0.204	0.077	2.383	1.879	1124.15	5.0322	33.5648	7.79423	51.9875
		23	313.987	0.006	0.085	0.582	1.178	0.205	0.073	4.02	1.858	1115.56	5.99871	40.0114	9.51401	63.4585	10.0426			0.005	0.081	0.579	1.137	0.199	0.062	2.878	1.649	1030.47	5.90928	39.4149	9.19069	61.3019
		24	327.336	0.007	0.089	0.585	1.188	0.214	0.076	3.936	2.789	1137.63	5.85967	39.084	9.25141	61.7069	9.76538			0.006	0.085	0.582	1.146	0.206	0.066	2.797	2.553	1074.28	5.76069	38.4238	8.92148	59.5062
		25	342.641	0.005	0.107	0.681	1.379	0.244	0.079	4.243	2.27	1203.2	6.50569	43.393	10.2313	68.243	10.7997			0.004	0.103	0.678	1.337	0.237	0.069	3.101	2.072	1124.52	6.41744	42.8043	9.92244	66.1827
		25_cr_av	345.857	0.00566667	0.102333	0.642333	1.29	0.232	0.0733333	3.78567	1.95467	1238.92	6.09963	40.6845	9.50543	63.4012	10.0335			0.00533333	0.0973333	0.639	1.246	0.224333	0.069	2.65233	1.72267	1135.07	5.9997	40.018	9.18275	61.2489
		26	344.661	0.011	0.108	0.727	1.458	0.252	0.079	4.736	2.919	1211.15	6.81226	45.4378	10.7166	71.4798	11.312			0.01	0.104	0.724	1.416	0.245	0.065	3.573	2.641	1131.14	6.72452	44.8525	10.4095	69.4316
		29	272.23	0.01	0.076	0.467	0.958	0.163	0.061	3.098	0.826	947.781	5.60173	37.3635	8.89453	59.3265	9.38867			0.01	0.072	0.464	0.916	0.157	0.054	2.001	0.673	893.432	5.49858	36.6756	8.51368	56.7862
		31	240.552	0.009	0.071	0.467	0.942	0.161	0.049	3.163	1.064	878.857	6.27656	41.8647	9.90422	66.0611	10.4544			0.008	0.067	0.464	0.899	0.154	0.041	2.033	0.834	789.468	6.15085	41.0262	9.45525	63.0665
		32	279.432	0.006	0.083	0.524	1.06	0.182	0.062	3.101	0.345	1007.6	6.09895	40.68	9.60063	64.0362	10.134			0.006	0.078	0.521	1.016	0.173	0.055	1.975	0.365	917.067	5.96754	39.8035	9.19094	61.3036
		33	318.498	0.007	0.085	0.522	1.074	0.192	0.073	3.309	0.388	1103.61	5.41869	36.1427	8.58581	57.2674	9.0628			0.008	0.081	0.519	1.031	0.184	0.066	2.199	0.473	1045.28	5.31696	35.4642	8.23994	54.9604
		34_cr_av	286.789	0.0025	0.0795	0.491	0.999	0.17425	0.06325	3.32	1.27475	1041.88	5.60921	37.4134	8.83653	58.9397	9.32745			0.002	0.07525	0.488	0.95625	0.1675	0.05575	2.17975	1.09275	941.213	5.50377	36.7101	8.46371	56.453
		35	313.262	0.008	0.092	0.612	1.244	0.209	0.068	4.56	2.329	1118.38	6.29532	41.9898	10.0187	66.8249	10.5753			0.007	0.088	0.609	1.202	0.202	0.054	3.388	2.12	1028.09	6.19878	41.3459	9.68086	64.5713
		36	311.71	0.006	0.09	0.634	1.267	0.214	0.066	4.654	3.122	1176.5	6.49989	43.3543	10.2626	68.4517	10.8328			0.005	0.086	0.631	1.224	0.207	0.052	3.465	2.861	1023	6.40288	42.7072	9.91615	66.1407
		38	341.325	0.002	0.088	0.531	1.098	0.2	0.088	3.509	0.779	1213.9	5.18286	34.5697	8.21411	54.7881	8.67045			0.001	0.084	0.528	1.055	0.193	0.079	2.361	0.741	1120.19	5.09427	33.9788	7.8977	52.6776
		39	334.064	0.003	0.09	0.535	1.102	0.199	0.079	3.516	0.817	1160.29	5.32784	35.5367	8.41204	56.1083	8.87937			0.002	0.085	0.532	1.059	0.192	0.071	2.384	0.779	1096.37	5.23085	34.8898	8.08875	53.9519
		40	310.481	0.006	0.087	0.505	1.043	0.191	0.076	3.583	0.982	1119.83	5.44729	36.3334	8.58487	57.2611	9.06181			0.006	0.082	0.502	1	0.184	0.064	2.42	0.873	1018.97	5.34293	35.6374	8.23702	54.9409
		47_cr_av	361.73	0.0015	0.108	0.6215	1.2845	0.23375	0.09125	4.202	1.67375	1334.85	5.75187	38.3649	9.06594	60.4698	9.56961			0.0005	0.10325	0.6185	1.24025	0.226	0.0805	3.00925	1.4855	1187.16	5.65931	37.7476	8.75544	58.3988
		Average spectrum	306.08	0.005	0.074	0.487	0.997	0.174	0.062	3.45	2.216	1004.52	5.18688	34.5965	8.26372	55.119	8.72282			0.005	0.07	0.484	0.955	0.167	0.052	2.344	2.004	918.852	5.08808	33.9375	7.91793	52.8126
												min	4.21112	28.0882	7.05677	47.0687	7.44881											min	4.05135	27.0225	6.53922	43.6166
												max	7.96568	53.1311	12.3943	82.6699	13.0829											max	7.83001	52.2262	11.9195	79.5027
												average	5.74426	38.3142	9.08678	60.6088	9.5916											average	5.6353	37.5875	8.71461	58.1264
												std. deviation	0.836019	5.57625	1.24667	8.31532	1.31593											std. deviation	0.836551	5.5798	1.24486	8.30323
												relative std. dev.	14.554	14.554	13.7197	13.7197	13.7197											relative std. dev.	14.8448	14.8448	14.2848	14.2848
Bogács, wine cellars, Unit III/A/2 of Biró et al., (2020)	BG	0	250.445	0.009	0.074	0.55	1.08	0.181	0.053	3.408	1.972	876.534	6.94285	46.3088	10.8757	72.5409	11.4799			0.008	0.07	0.547	1.037	0.174	0.046	2.284	1.743	821.934	6.82211	45.5035	10.4445	69.6646
		1	268.525	0.008	0.085	0.578	1.146	0.195	0.063	3.451	1.391	969.164	6.9017	46.0343	10.7869	71.9487	11.3862			0.007	0.08	0.575	1.103	0.187	0.054	2.311	1.17	881.273	5.05964	33.7478	7.79457	51.9898
		2	227.671	0.005	0.063	0.431	0.869	0.151	0.057	2.669	1.244	910.245	6.11934	40.816	9.6771	64.5463	10.2147			0.005	0.058	0.428	0.826	0.143	0.05	1.547	1.008	747.195	5.69241	37.9684	8.61452	57.4588
		3	276.169	0.003	0.063	0.401	0.807	0.152	0.073	2.716	1.766	1065.74	4.81791	32.1355	7.50062	50.0291	7.91732			0.002	0.058	0.398	0.764	0.144	0.063	1.568	1.546	906.36	4.69277	31.3008	7.10173	47.3685
		4	262.748	0.007	0.052	0.36	0.715	0.137	0.063	2.33	1.706	1010.53	4.51323	30.1032	7.00413	46.7176	7.39325			0.007	0.048	0.357	0.674	0.129	0.058	1.262	1.484	862.312	4.38991	29.2807	6.60131	44.0307
		5	284.396	0.01	0.09	0.644	1.302	0.222	0.062	3.872	1.688	1132.89	7.26086	48.43	11.5748	77.2042	12.2179			0.01	0.086	0.641	1.259	0.215	0.053	2.734	1.463	933.359	7.15453	47.7207	11.1951	74.6713
		6	270.279	0.007	0.06	0.379	0.781	0.142	0.067	2.601	0.612	990.406	4.6432	30.9701	7.37637	49.2004	7.78617			0.007	0.056	0.376	0.739	0.134	0.061	1.506	0.572	887.029	4.52332	30.1706	6.97679	46.5352
		10	294.195	0.003	0.079	0.517	1.059	0.186	0.068	3.132	1.012	1209.55	5.7415	38.2958	9.14087	60.9696	9.6487			0.004	0.075	0.514	1.015	0.178	0.063	1.997	0.893	965.519	5.63136	37.5612	8.75908	58.4231
		16_av	299.627	0.0105	0.08525	0.63	1.222	0.20925	0.071	3.7645	3.00575	1112.46	5.89117	39.2941	10.3178	60.8326	10.8911			0.0095	0.08025	0.62675	1.17925	0.2015	0.064	2.6345	2.74925	983.345	6.54935	43.6842	9.95379	66.3918
		18	297.396	0.006	0.096	0.609	1.228	0.21	0.068	3.344	-0.172	1041.78	6.64568	44.3267	10.4442	69.6631	11.0245			0.005	0.091	0.606	1.185	0.202	0.064	2.238	0.025	976.025	6.52947	43.5516	10.0738	67.1924
		19	273.246	0.005	0.074	0.449	0.914	0.16	0.065	2.564	-0.081	975.96	5.3991	36.012	8.48994	56.6279	8.96161			0.006	0.069	0.446	0.87	0.153	0.062	1.478	0.052	896.765	5.28052	35.2211	8.08679	53.9389
		20	292.31	0.002	0.076	0.418	0.872	0.163	0.072	2.697	0.489	1043.81	4.85485	32.3819	7.64805	51.0125	8.07295			0.002	0.071	0.415	0.828	0.155	0.066	1.591	0.45	959.331	4.73662	31.5933	7.2638	48.4496
		21	302.959	0.007	0.085	0.511	1.039	0.188	0.073	2.886	1.086	1081.98	5.58966	37.283	8.74811	58.3499	9.23411			0.008	0.081	0.508	0.996	0.181	0.07	1.791	0.9	994.282	5.48985	36.6173	8.39162	55.9721
		22	287.144	0.004	0.097	0.577	1.187	0.224	0.094	3.61	3.12	998.708	6.75508	45.0564	10.6141	70.7958	11.2037			0.004	0.093	0.574	1.145	0.218	0.092	2.517	2.793	942.377	6.65729	44.4041	10.253	68.3874
		23	289.196	0.002	0.078	0.481	0.984	0.173	0.067	2.743	0.368	1014.49	5.4673	36.4669	8.64163	57.6396	9.12172			0.003	0.073	0.478	0.941	0.166	0.064	1.659	0.37	949.111	5.35527	35.7196	8.26818	55.1487
		24	287.018	0.013	0.09	0.679	1.321	0.219	0.055	4.44	3.688	1058.88	7.43535	49.5938	11.5895	77.302	12.2334			0.012	0.086	0.676	1.278	0.212	0.043	3.27	3.315	941.965	7.32999	48.891	11.2132	74.7922
		26	276.788	0.004	0.082	0.546	1.084	0.182	0.064	3.005	0.518	1044.92	6.32107	42.1616	9.8796	65.897	10.4285			0.005	0.077	0.543	1.04	0.174	0.058	1.879	0.53	908.392	6.19621	41.3287	9.47381	63.1903
		27	300.812	0.007	0.088	0.584	1.179	0.191	0.067	3.293	0.021	1037.34	6.19683	41.3328	9.83737	65.6153	10.3839			0.008	0.083	0.581	1.137	0.183	0.061	2.2	0.134	987.235	6.08194	40.5665	9.47834	63.2206
		28	305.578	0.008	0.083	0.594	1.171	0.199	0.068	3.386	1.507	1111.46	6.19207	41.3011	9.68395	64.5919	10.2219			0.008	0.078	0.591	1.127	0.192	0.06	2.233	1.291	1002.88	6.08604	40.5939	9.32345	62.1874
		29	290.695	0.005	0.059	0.408	0.818	0.144	0.068	2.524	1.276	1015.93	4.54002	30.2819	7.14811	47.6779	7.54523			0.006	0.055	0.405	0.775	0.137	0.062	1.427	1.117	954.032	4.43599	29.588	6.77659	45.1998
		30_av	297.717	0.00625	0.05725	0.459	0.87975	0.16275	0.0705	2.93575	3.371	1061.93	4.92629	32.8584	7.56357	50.449	7.98376			0.00625	0.05225	0.456	0.83725	0.1555	0.0625	1.80925	3.095	977.077	4.81565	32.1204	7.20262	48.0415
		31	299.76	0.01	0.091	0.738	1.432	0.232	0.065	4.45	4.298	1049.09	7.64532	50.9943	11.9904	79.9759	12.6565			0.009	0.087	0.735	1.39	0.226	0.052	3.305	3.939	983.782	10.7078	71.4208	15.3123	102.133
		32	282.853	0.005	0.069	0.53	1.039	0.175	0.068	3.259	2.747	1005.98	5.91063	39.4239	9.27068	61.8355	9.78572			0.005	0.065	0.527	0.997	0.168	0.057	2.126	2.426	928.295	5.80372	38.7108	8.8965	59.3396
		33	297.175	0.013	0.065	0.534	1.025	0.176	0.074	3.378	4.094	1074.01	5.63305	37.5725	8.72942	58.2252	9.21438			0.013	0.061	0.531	0.982	0.169	0.062	2.217	3.757	975.297	5.5313	36.8937	8.36599	55.8012
		34	295.872	0.001	0.074	0.474	0.953	0.162	0.072	2.84	0.698	1088.95	5.18332	34.5728	8.14001	54.2939	8.59223			0.003	0.069	0.471	0.909	0.154	0.062	1.715	0.691	971.022	5.06652	33.7937	7.76039	51.7618
		35	263.027	0.005	0.079	0.508	1.015	0.175	0.058	2.844	0.221	917.549	6.25761	41.7383	9.77238	65.1818	10.3153			0.005	0.075	0.505	0.972	0.167	0.056	1.786	0.267	863.228	6.13443	40.9166	9.35357	62.3883
		36	284.6	0.008	0.076	0.533	1.022	0.181	0.057	2.299	2.073	1014.61	5.99579	39.9919	9.1303	60.8991	9.63753			0.009	0.071	0.53	0.98	0.175	0.073	1.593	1.745	934.028	5.88953	39.2832	8.76599	58.4692
		37	283.744	0.009	0.067	0.455	0.899	0.164	0.071	2.766	2.091	1013.05	5.22217	34.8319	8.09208	53.9742	8.54164			0.008	0.062	0.452	0.857	0.157	0.066	1.651	1.866	931.22	5.10798	34.0702	7.71907	51.4862
		38	238.189	0.007	0.07	0.472	0.941	0.159	0.054	2.947	1.502	853.06	6.35696	42.401	9.97527	66.535	10.5294			0.006	0.066	0.469	0.899	0.152	0.048	1.841	1.261	781.713	6.23001	41.5541	9.53091	63.5712
		39	281.797	0.01	0.078	0.506	1.011	0.176	0.065	3.172	1.738	970.047	5.82548	38.856	9.09848	60.6869	9.60395			0.01	0.073	0.503	0.968	0.168	0.059	2.038	1.489	924.828	5.70284	38.0379	8.70756	58.0794
		40	282.98	0.005	0.071	0.45	0.907	0.164	0.067	2.847	0.912	973.033	5.22864	34.8751	8.175	54.5273	8.62917			0.005	0.066	0.447	0.864	0.157	0.062	1.732	0.779	928.711	5.11415	34.1114	7.79335	51.9817
		41_av	293.049	0.01	0.0735	0.45325	0.90775	0.16	0.06675	2.951	1.757	1021.72	5.06188	33.7627	7.87015	52.4939	8.30738			0.00925	0.069	0.45025	0.86475	0.1525	0.06025	1.8345	1.72025	961.758	4.95132	33.0253	7.49792	50.0111
		42	299.246	0.009	0.069	0.462	0.918	0.169	0.068	2.79	1.705	1034.92	5.0527	33.7015	7.84612	52.3336	8.28202			0.009	0.065	0.459	0.876	0.162	0.066	1.701	1.526	982.095	4.95165	33.0275	7.49243	49.9745
		Average spectrum	285.914	0.007	0.075	0.513	1.018	0.178	0.067	3.116	1.853	1032.6	5.78692	38.5987	9.03545	60.2664	9.53741			0.007	0.07	0.51	0.975	0.171	0.061	2.007	1.687	938.341	5.6736	37.8429	8.65771	57.7469
												min	4.54002	30.2819	7.14811	47.6779	7.54523											min	4.43599	29.588	6.77659	45.1998
												max	7.64532	50.9943	11.9904	79.9759	12.6565											max	10.7078	71.4208	15.3123	102.133
												average	5.80237	38.7018	9.06565	60.4679	9.56929											average	5.83528	38.9213	8.85639	59.0721
												std. deviation	0.789594	5.26659	1.24658	8.31466	1.31583											std. deviation	1.26169	8.41546	1.76627	11.781
												relative std. dev.	13.6081	13.6081	13.7506	13.7506	13.7506											relative std. dev.	21.6217	21.6217	19.9434	19.9434
