# Supplementary material for: Uniform “water” content in quartz phenocrysts from silicic pyroclastic fallout deposits – implications on pre-eruptive conditions
Source: Copernicus journal article supplement (doi:10.5194/ejm-33-571-2021), 2021-09-24
Supplement: Supplementary file 2 [file Supplementary2.xlsx]

## Sheet: Evaluation
AD1314 Kaharoa eruption, Taupo Volcanic Zone, New Zealand
				Without baseline correction																Concave rubberband baseline correction, 2 iterations
Sampling site	Code of the site	Code of the phenocrysts	Thickness (based on Biró et al., 2016)	Integrated absorbance									Structural OH concentration							Integrated absorbance									Structural OH- concetration
				3480	3430	3378	3430+3378	3315	3200	Total OH Region	Epoxy	SiO2 overtone (A-type int.)	3430 + 3378 + 3315 (more conservative)		(3430 + 3378) + 3315 Biró et al., 2017					3480 (Li)	3430	3378	3430+3378	3315	3200 (surface water)	Total Hydroxyl Region (3502-3153)	Epoxy	SiO (silica overtone) (A-type int.)	3430 + 3378 + 3315 (more conservative)		(3430 + 3378) + 3315 Biró et al., 2017
													ppm	H / 106 Si	ppm	H / 106 Si	absorp. coeff. L&R 1997 ppm												ppm	H / 106 Si	ppm	H / 106 Si
New Zealand, KH1 Kaharoa eruption"quarry" pyroclastic fallout deposit	NZ/KH1	1	172.876	0.003	0.037	0.26	0.524	0.093	0.042	1.658	0.391	590.575	4.87285	32.5019	7.70911	51.4197	8.13739			0.004	0.033	0.257	0.485	0.087	0.043	0.873	0.329	567.362	4.71043	31.4185	7.14685	47.6695
		2	214.55	0.009	0.058	0.425	0.865	0.133	0.053	2.415	0.404	718.081	6.20164	41.3649	10.0475	67.0165	10.6056			0.01	0.054	0.422	0.826	0.126	0.052	1.456	0.438	704.131	6.06069	40.4248	9.58435	63.9276
		3	220.866	0.011	0.049	0.302	0.601	0.117	0.048	1.922	0.326	751.142	4.57689	30.5279	7.02182	46.8355	7.41192			0.01	0.044	0.299	0.561	0.11	0.045	1.063	0.339	724.86	4.4302	29.5494	6.56217	43.7697
		4	238.164	-0.001	0.061	0.467	0.906	0.158	0.053	2.601	1.154	885.868	6.22158	41.498	9.6498	64.3642	10.1859			-0.001	0.056	0.464	0.865	0.151	0.051	1.596	0.935	781.632	6.08554	40.5906	9.21447	61.4605
		5	234.805	0.001	0.073	0.523	1.042	0.17	0.05	2.93	0.298	809.791	7.04652	47.0003	11.1493	74.366	11.7687			0.001	0.069	0.521	1.001	0.163	0.046	1.877	0.33	770.607	6.92694	46.2027	10.7078	71.4208
		6	236.304	0.01	0.06	0.421	0.817	0.144	0.052	2.554	1.676	831.432	5.71299	38.1056	8.78429	58.5912	9.27231			0.01	0.056	0.418	0.777	0.137	0.049	1.524	1.46	775.525	5.58502	37.2521	8.35467	55.7257
		7	200.406	0.001	0.038	0.265	0.538	0.098	0.052	1.743	0.514	720.077	4.32204	28.828	6.8549	45.7222	7.23573			0.002	0.033	0.262	0.499	0.092	0.051	0.846	0.424	657.711	4.17114	27.8215	6.36988	42.4871
		8	238.419	0	0.049	0.363	0.72	0.132	0.062	2.232	1.409	884.547	4.92846	32.8728	7.71884	51.4847	8.14767			0.001	0.045	0.36	0.678	0.125	0.061	1.237	1.164	782.468	4.80163	32.0268	7.27492	48.5237
		10	257.795	0.009	0.066	0.482	0.937	0.168	0.056	2.783	0.951	870.619	5.9992	40.0146	9.25853	61.7544	9.7729			0.009	0.062	0.479	0.896	0.161	0.053	1.784	0.819	846.056	5.88189	39.2322	8.85635	59.0719
		11	206.985	0.014	0.05	0.331	0.644	0.121	0.046	2.078	0.316	689.327	5.23864	34.9417	7.98319	53.2479	8.4267			0.014	0.046	0.328	0.604	0.115	0.045	1.252	0.294	679.304	5.10298	34.0369	7.50315	50.046
		12	223.629	0.006	0.049	0.359	0.707	0.132	0.048	2.192	0.629	753	5.21579	34.7893	8.10379	54.0523	8.554			0.007	0.045	0.356	0.666	0.125	0.049	1.29	0.53	733.927	5.08056	33.8874	7.64016	50.9599
		13	204.004	0.007	0.054	0.401	0.791	0.136	0.042	2.275	0.666	683.264	6.25753	41.7377	9.81511	65.4668	10.3604			0.008	0.05	0.398	0.752	0.129	0.043	1.377	0.535	669.52	6.1093	40.749	9.32806	62.2182
		14	218.889	0.004	0.05	0.381	0.756	0.132	0.048	2.315	1.252	750.364	5.55568	37.0564	8.76278	58.4478	9.2496			0.005	0.046	0.378	0.716	0.125	0.046	1.337	1.026	718.373	5.41753	36.1349	8.29899	55.3542
		15	241.642	0.01	0.069	0.567	1.081	0.185	0.047	3.116	0.921	812.517	7.3388	48.9498	11.3166	75.4816	11.9453			0.01	0.065	0.564	1.04	0.178	0.044	2.093	0.76	793.044	7.21365	48.1151	10.8875	72.6198
		17	262.354	0.003	0.07	0.487	0.987	0.163	0.061	2.791	0.33	906.365	5.92787	39.5389	9.46812	63.1524	9.99413			0.004	0.066	0.484	0.947	0.156	0.057	1.742	0.387	861.02	5.8126	38.7701	9.08116	60.5713
		19	217.226	0.009	0.054	0.409	0.798	0.14	0.049	2.646	0.799	760.785	5.99596	39.993	9.32705	62.2114	9.84522			0.008	0.05	0.407	0.757	0.134	0.042	1.616	0.719	712.915	5.87664	39.1972	8.8597	59.0942
		20	223.431	-0.002	0.062	0.461	0.896	0.149	0.049	2.249	1.062	872.767	6.4965	43.3317	10.1025	67.3833	10.6637			-0.001	0.057	0.458	0.855	0.142	0.054	1.3	0.866	733.278	6.35149	42.3645	9.63841	64.2882
		23	275.276	-0.006	0.059	0.445	0.904	0.156	0.066	2.376	0.071	960.763	5.1788	34.5426	8.31747	55.4775	8.77956			-0.005	0.054	0.442	0.862	0.149	0.069	1.353	0.232	903.428	5.0611	33.7576	7.93299	52.913
		24	260.599	-0.007	0.062	0.459	0.932	0.155	0.06	2.515	0.423	903.483	5.6031	37.3727	9.00971	60.0948	9.51025			-0.006	0.057	0.456	0.89	0.147	0.061	1.477	0.431	855.259	5.47048	36.4881	8.59528	57.3305
		25	275.477	-0.004	0.069	0.515	1.038	0.175	0.06	2.672	0.372	938.212	5.95127	39.695	9.51106	63.4387	10.0394			-0.003	0.065	0.512	0.996	0.168	0.063	1.657	0.425	904.089	5.8415	38.9628	9.12685	60.8761
		26	271.551	-0.004	0.057	0.401	0.817	0.13	0.046	2.229	1.092	924.427	4.67713	31.1965	7.53273	50.2433	7.95122			-0.003	0.053	0.398	0.775	0.123	0.048	1.198	0.932	891.203	4.56577	30.4537	7.14297	47.6436
		28	211.317	0.01	0.067	0.467	0.929	0.151	0.043	2.462	0.183	729.657	7.00182	46.7021	11.0394	73.6325	11.6527			0.011	0.063	0.464	0.888	0.144	0.046	1.502	0.207	693.52	6.85871	45.7476	10.5487	70.36
		29	225.77	-0.002	0.05	0.361	0.729	0.124	0.051	1.854	0.496	806.186	5.11849	34.1403	8.16088	54.4331	8.61426			0	0.046	0.358	0.688	0.117	0.056	0.965	0.466	740.954	4.98455	33.2469	7.70165	51.37
		30again	264.512	0.005	0.079	0.615	1.194	0.202	0.056	3.133	0.322	929.076	7.31673	48.8026	11.3997	76.0361	12.033			0.005	0.075	0.613	1.152	0.195	0.056	2.149	0.383	868.101	7.21057	48.0945	10.9996	73.3673
		31	277.759	0.005	0.04	0.316	0.649	0.124	0.067	2.061	0.607	1007.03	3.73273	24.8973	6.01126	40.0951	6.34521			0.005	0.036	0.313	0.608	0.118	0.066	1.047	0.623	911.577	3.63164	24.223	5.64576	37.6572
		NZKH1_av	234.984	0.004	0.057	0.419	0.832	0.144	0.052	2.392	0.667	819.574	5.69911	38.0131	8.9715	59.8399	9.46992			0.004	0.053	0.416	0.791	0.137	0.052	1.424	0.602	771.194	5.57042	37.1547	8.53028	56.897
												min	3.73273	24.8973	6.01126	40.0951	6.34521											min	3.63164	24.223	5.64576	37.6572
												max	7.3388	48.9498	11.3997	76.0361	12.033											max	7.21365	48.1151	10.9996	73.3673
												average	5.69956	38.0161	8.96221	59.778	9.46011											average	5.5697	37.1499	8.5201	56.829
												std. deviation	0.916775	6.11489	1.41336	9.42708	1.49188											std. deviation	0.918059	6.12346	1.41478	9.43656
												relative std. dev.	16.085	16.085	15.7702	15.7702	15.7702											relative std. dev.	16.4831	16.4831	16.6052	16.6052
New Zealand, KH2 Kaharoa eruption "SH roadcut" pyroclastic fallout deposit	NZ/KH2	1	247.388	0.007	0.084	0.679	1.314	0.215	0.049	3.655	1.366	933.087	8.53914	56.9561	13.3501	89.0448	14.0917			0.007	0.08	0.676	1.271	0.207	0.045	2.53	1.128	811.902	8.40818	56.0825	12.9048	86.0747
		2	243.752	0.007	0.059	0.484	0.963	0.165	0.056	2.774	0.787	891.015	6.27392	41.847	9.99573	66.6715	10.551			0.007	0.055	0.481	0.922	0.158	0.053	1.722	0.73	799.97	6.14985	41.0195	9.57038	63.8344
		3	268.898	0.01	0.072	0.572	1.11	0.195	0.057	3.325	0.843	962.867	6.73952	44.9526	10.4828	69.9203	11.0652			0.01	0.067	0.569	1.067	0.187	0.05	2.219	0.768	882.495	6.61099	44.0953	10.0731	67.1878
		4	285.443	0.025	0.091	0.707	1.379	0.235	0.063	4.207	1.476	1006.37	7.8169	52.1387	12.2134	81.4636	12.892			0.024	0.086	0.704	1.338	0.228	0.051	3.087	1.3	936.796	7.70339	51.3816	11.8502	79.0409
		5	265.376	0.007	0.057	0.422	0.85	0.15	0.074	2.756	0.998	1070.52	5.11968	34.1482	8.13939	54.2897	8.59158			0.007	0.053	0.419	0.808	0.143	0.065	1.627	0.886	870.938	5.00572	33.3882	7.74056	51.6295
		6	268.841	0.007	0.074	0.578	1.128	0.189	0.067	3.359	0.894	1087.24	6.75701	45.0693	10.5814	70.5782	11.1693			0.006	0.069	0.575	1.085	0.182	0.058	2.225	0.829	882.308	6.6365	44.2654	10.1797	67.8987
		7	290.194	0.012	0.088	0.666	1.309	0.219	0.073	4.136	1.886	1112.87	7.24233	48.3063	11.3734	75.8603	12.0052			0.011	0.083	0.663	1.266	0.212	0.059	2.969	1.643	952.388	7.13068	47.5616	11.0012	73.3779
		8	261.251	0.013	0.072	0.541	1.062	0.182	0.065	3.25	0.624	1007.83	6.57299	43.8418	10.2853	68.6028	10.8567			0.012	0.067	0.538	1.02	0.175	0.055	2.129	0.622	857.4	6.44897	43.0146	9.88015	65.9006
		9	286.384	0.009	0.07	0.557	1.103	0.194	0.073	3.452	0.729	1032.02	6.19225	41.3023	9.7824	65.2486	10.3259			0.008	0.066	0.554	1.061	0.187	0.06	2.326	0.728	939.883	6.08666	40.598	9.41282	62.7835
		10	274.082	0.015	0.074	0.586	1.16	0.2	0.064	3.539	0.651	970.728	6.77752	45.2061	10.7179	71.4887	11.3134			0.015	0.07	0.583	1.118	0.192	0.052	2.426	0.675	899.511	6.65931	44.4176	10.3239	68.8604
		11	269.356	0.015	0.055	0.448	0.904	0.161	0.065	3.075	0.589	935.9	5.3247	35.5157	8.54037	56.9642	9.01483			0.015	0.051	0.445	0.862	0.153	0.054	1.965	0.63	884	5.20441	34.7134	8.13941	54.2899
		15	270.103	0.005	0.06	0.49	0.97	0.173	0.057	2.735	0.733	935.778	5.7818	38.5646	9.14052	60.9673	9.64833			0.006	0.056	0.487	0.929	0.166	0.057	1.752	0.711	886.45	5.66984	37.8179	8.75667	58.407
		16	280.987	0.003	0.087	0.662	1.322	0.219	0.059	3.56	0.283	1009.96	7.44121	49.6329	11.846	79.0126	12.5041			0.003	0.083	0.659	1.28	0.212	0.055	2.473	0.389	922.17	7.33359	48.915	11.4693	76.5002
		17	294.645	0.015	0.123	0.928	1.844	0.293	0.052	4.905	1.134	1079.36	9.85266	65.7173	15.666	104.492	16.5364			0.014	0.119	0.925	1.802	0.285	0.045	3.786	1.009	966.996	9.7427	64.9838	15.2995	102.048
		19	285.362	0.005	0.081	0.584	1.223	0.204	0.066	3.365	0.959	1158.36	6.57775	43.8736	10.8014	72.0456	11.4015			0.005	0.077	0.581	1.181	0.197	0.062	2.271	0.862	936.529	6.47178	43.1668	10.4305	69.5717
		20	249.615	0.001	0.083	0.599	1.191	0.195	0.054	3.2	0.189	949.513	7.58897	50.6184	11.9935	79.9968	12.6598			0	0.078	0.596	1.149	0.188	0.048	2.124	0.278	819.211	7.45917	49.7527	11.5695	77.1686
		21	293.85	0.006	0.087	0.738	1.447	0.24	0.057	4.111	1.459	1059.4	7.82849	52.2161	12.4006	82.7122	13.0896			0.005	0.083	0.735	1.405	0.233	0.05	2.996	1.261	964.385	7.72558	51.5297	12.0404	80.3098
		22	285.174	0.005	0.085	0.644	1.287	0.212	0.062	3.573	0.517	1030.91	7.12743	47.54	11.3539	75.7305	11.9847			0.004	0.08	0.641	1.246	0.205	0.056	2.487	0.571	935.913	7.01382	46.7822	10.9903	73.3056
		24	265.938	0.001	0.054	0.387	0.828	0.149	0.056	2.373	0.746	896.39	4.7921	31.9633	7.93539	52.9291	8.37625			0.002	0.05	0.384	0.787	0.142	0.054	1.37	0.683	872.781	4.67839	31.2049	7.54553	50.3287
		25	269.587	0.006	0.089	0.633	1.312	0.21	0.053	3.664	1.208	906.412	7.46743	49.8077	12.1947	81.3384	12.8721			0.005	0.085	0.63	1.27	0.203	0.046	2.576	0.994	884.757	7.35526	49.0596	11.8021	78.7197
		26	279.213	0.006	0.052	0.415	0.862	0.157	0.065	2.858	1.224	951.248	4.82728	32.198	7.88302	52.5797	8.32096			0.006	0.048	0.413	0.821	0.15	0.059	1.777	1.035	916.349	4.72671	31.5272	7.51169	50.1029
		27	286.854	0.007	0.053	0.437	0.881	0.16	0.067	2.616	1.116	980.631	4.89448	32.6462	7.8387	52.2841	8.27418			0.008	0.049	0.434	0.84	0.153	0.065	1.626	0.991	941.425	4.78906	31.943	7.47726	49.8733
		28	283.526	0.015	0.001	0.048	0.119	0.06	0.079	0.764	0.037	983.207	0.830401	5.53877	1.36369	9.09578	1.43945			0.017	0	0.045	0.088	0.054	0.071	0.173	0.208	930.503	0.754217	5.03063	1.08181	7.21565
		29	288.723	0.008	0.06	0.447	0.906	0.162	0.071	2.598	1.24	1085.14	5.00494	33.3829	7.98994	53.2929	8.43383			0.009	0.055	0.444	0.864	0.155	0.066	1.522	1.06	947.56	4.89272	32.6344	7.62336	50.8478
		37	262.395	-0.001	0.074	0.501	1.076	0.171	0.06	3.434	1.022	893.305	6.14097	40.9603	10.2651	68.4685	10.8354			-0.001	0.07	0.498	1.035	0.165	0.049	2.333	0.826	861.154	6.03396	40.2465	9.87824	65.8879
		NZKH2_av	274.277	0.008	0.072	0.55	1.102	0.189	0.063	3.251	0.908	997.203	6.38682	42.6001	10.1669	67.8134	10.7318			0.008	0.067	0.547	1.061	0.181	0.055	2.18	0.833	900.151	6.26081	41.7596	9.78105	65.2396
												min	0.830401	5.53877	1.36369	9.09578	1.43945											min	0.754217	5.03063	1.08181	7.21565
												max	9.85266	65.7173	15.666	104.492	16.5364											max	9.7427	64.9838	15.2995	102.048
												average	6.38048	42.5578	10.1654	67.8031	10.7301											average	6.26766	41.8053	9.7821	65.2466
												std. deviation	1.66678	11.1174	2.60402	17.3688	2.74869											std. deviation	1.6604	11.0749	2.58872	17.2668
												relative std. dev.	26.1231	26.1231	25.6166	25.6166	25.6166											relative std. dev.	26.4916	26.4916	26.4638	26.4638
