# Supplementary material for: Uniform “water” content in quartz phenocrysts from silicic pyroclastic fallout deposits – implications on pre-eruptive conditions
Source: Copernicus journal article supplement (doi:10.5194/ejm-33-571-2021), 2021-09-24
Supplement: Supplementary file 3 [file Supplementary3.xlsx]

## Sheet: Single_crystals
Single crushed crystal measurements
				Without baseline correction																Concave rubberband baseline correction, 2 iterations
Sampling site	Code of the site	Code of the phenocrysts	Thickness (based on Biró et al., 2016)	Integrated absorbance									Structural OH concentration							Integrated absorbance									Structural OH- concetration
				3480	3430	3378	3430+3378	3315	3200	Total OH Region	Epoxy	SiO2 overtone (A-type int.)	3430 + 3378 + 3315 (more conservative)		(3430 + 3378) + 3315 Biró et al., 2017					3480 (Li)	3430	3378	3430+3378	3315	3200 (surface water)	Total Hydroxyl Region (3502-3153)	Epoxy	SiO (silica overtone) (A-type int.)	3430 + 3378 + 3315 (more conservative)		(3430 + 3378) + 3315 Biró et al., 2017
													ppm	H / 106 Si	ppm	H / 106 Si	absorp. coeff. L&R 1997 ppm												ppm	H / 106 Si	ppm	H / 106 Si
Eger, Tufakőbánya, layer B of Hencz et al., (2021) (pyroclastic fallout deposit) - crushed single crystals	E (crushed)	2_3	272.772	0.012	0.136	0.861	1.702	0.256	0.032	4.279	-0.23	1121.81	9.92214	66.1807	15.5048	103.417	16.3662			0.012	0.134	0.861	1.688	0.252	0.026	3.819	0.21	895.21	9.87463	65.8638	15.3623	102.466
		5	262.117	0.011	0.094	0.535	1.115	0.182	0.052	3.75	-0.959	1003.47	6.68311	44.5764	10.688	71.2892	11.2818			0.01	0.089	0.532	1.074	0.173	0.04	2.622	-0.058	860.243	6.54302	43.642	10.276	68.541
		7	260.838	0.007	0.08	0.45	0.919	0.157	0.055	2.604	0.501	966.005	5.68906	37.946	8.91037	59.4322	9.40539			0.006	0.075	0.447	0.874	0.149	0.051	1.465	0.436	856.043	5.55656	37.0623	8.47148	56.5048
		9	205.899	0.001	0.06	0.408	0.793	0.132	0.047	1.685	0.526	709.481	6.29435	41.9833	9.70379	64.7243	10.2429			0.006	0.055	0.405	0.749	0.125	0.048	1.007	0.38	675.74	6.13699	40.9337	9.16877	61.1557
		10_C	200.153	0.007	0.076	0.449	0.949	0.147	0.026	2.852	-0.212	706.023	7.25206	48.3713	11.8278	78.8912	12.4849			0.006	0.073	0.446	0.911	0.138	0.027	1.792	0.153	656.881	7.09019	47.2916	11.3206	75.5081
		13	280.93	0	0.079	0.466	0.938	0.167	0.066	2.906	0.339	1073.97	5.4744	36.5142	8.49608	56.6688	8.96808			0.001	0.074	0.462	0.893	0.159	0.058	1.745	0.334	921.983	5.34369	35.6424	8.08857	53.9508
		14	238.741	0.007	0.089	0.573	1.139	0.17	0.039	2.824	0.445	895.284	7.52748	50.2083	11.8431	78.9936	12.5011			0.006	0.084	0.57	1.097	0.162	0.044	1.838	0.397	783.525	7.38272	49.2427	11.3907	75.9762
		15	242.349	0.012	0.108	0.716	1.392	0.221	0.025	3.063	-0.299	931.999	9.31384	62.1233	14.3763	95.8899	15.175			0.015	0.103	0.713	1.346	0.212	0.04	2.21	0.486	795.365	9.16233	61.1127	13.8861	92.6202
		16	213.849	0.002	0.064	0.502	0.995	0.165	0.04	2.622	0.09	805.722	7.38352	49.2481	11.7167	78.1501	12.3676			0.002	0.06	0.5	0.957	0.156	0.041	1.626	0.238	701.832	7.23201	48.2375	11.2419	74.9837
		17	200.854	0.009	0.044	0.325	0.643	0.125	0.021	1.164	-0.552	804.611	5.31251	35.4345	8.25913	55.0884	8.71797			0.012	0.04	0.322	0.602	0.116	0.038	0.885	0.223	659.183	5.14045	34.2868	7.72143	51.5019
		18	120.995	0.009	0.058	0.358	0.707	0.121	0.006	1.813	-0.507	491.619	9.5865	63.942	14.7814	98.5921	15.6026			0.01	0.054	0.355	0.668	0.114	0.009	0.995	0.58	397.094	9.33657	62.2749	13.9602	93.1147
												min	5.31251	35.4345	8.25913	55.0884	8.71797											min	5.14045	34.2868	7.72143	51.5019
												max	9.92214	66.1807	15.5048	103.417	16.3662											max	9.87463	65.8638	15.3623	102.466
												average	7.31263	48.7753	11.4643	76.467	12.1012											average	7.16356	47.7809	10.9898	73.3021
												std. deviation	1.58081	10.544	2.43938	16.2706	2.5749											std. deviation	1.58261	10.556	2.44822	16.3296
												relative std. dev.	21.6175	21.6175	21.278	21.278	21.278											relative std. dev.	22.0926	22.0926	22.2771	22.2771
