# Supplementary material for: Uniform “water” content in quartz phenocrysts from silicic pyroclastic fallout deposits – implications on pre-eruptive conditions
Source: Copernicus journal article supplement (doi:10.5194/ejm-33-571-2021), 2021-09-24
Supplement: Supplementary file [file ejm-33-571-2021-supplement-title-page.pdf › ejm-33-571-2021-supplement-title-page.pdf]

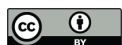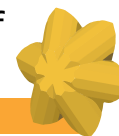

*Supplement of*

**Uniform “water” content in quartz phenocrysts from silicic pyroclastic fallout deposits – implications on pre-eruptive conditions**

**Mátyás Hencz et al.**

*Correspondence to:* Mátyás Hencz ([hemuabt@staff.elte.hu](mailto:hemuabt@staff.elte.hu))

- [ejm-33-571-2021-supplement-title-page.pdf](#)
- [Supplementary1.xlsx](#)
- [Supplementary2.xlsx](#)
- [Supplementary3.xlsx](#)

The copyright of individual parts of the supplement might differ from the article licence.
